# Supplementary material for: Efficacy and Safety of Sofosbuvir/Velpatasvir Plus Ribavirin in Patients with Hepatitis C Virus-Related Decompensated Cirrhosis
Source: MDPI journal article supplement (doi:10.3390/v15102026), 2023-09-29
Supplement: s1 [file s1]

Table S1. Deaths.

| Age | CTP at baseline, class (score) | MELD score at baseline | Completed treatment | Post-treatment study day of death | Cause of death <sup>†</sup>              | Comment                                                                                                                                                                                                              | SVR4            | SVR12           | SVR24            |
|-----|--------------------------------|------------------------|---------------------|-----------------------------------|------------------------------------------|----------------------------------------------------------------------------------------------------------------------------------------------------------------------------------------------------------------------|-----------------|-----------------|------------------|
| 59  | C (10)                         | 11                     | No*                 | N/A                               | Colitis                                  | Presented with colitis and pus pockets. Went on to develop sepsis and renal failure and died. The subject had an ongoing SAE of sepsis at the time of death.                                                         | No <sup>‡</sup> | No <sup>‡</sup> | No <sup>‡</sup>  |
| 64  | C (13)                         | 24                     | No*                 | N/A                               | Probable sepsis with multi-organ failure | Presented with shortness of breath, developed respiratory distress and died of probable sepsis with multiorgan failure. The subject had an ongoing SAE of respiratory distress.                                      | No <sup>‡</sup> | No <sup>‡</sup> | No <sup>‡</sup>  |
| 48  | B (9)                          | 18                     | Yes                 | 103                               | Acute pancreatitis                       | Had a preventive embolization of a pancreatic aneurysm, which was complicated by acute pancreatitis that led to multiorgan failure and death. The subject had an ongoing SAE of acute pancreatitis.                  | Yes             | Yes             | Yes <sup>‡</sup> |
| 59  | B (9)                          | 14                     | Yes                 | 164                               | Variceal hemorrhage                      | Found bleeding and deceased at home. The subject had an ongoing SAE of bleeding varicose veins.                                                                                                                      | Yes             | Yes             | Yes <sup>‡</sup> |
| 58  | C (10)                         | 15                     | Yes                 | 53                                | Cardiac arrest                           | Presented with hematemesis and shortness of breath and died of cardiac arrest due to hypovolemic shock because of upper gastrointestinal bleed. The subject had an ongoing SAE of upper gastrointestinal hemorrhage. | Yes             | No <sup>‡</sup> | No <sup>‡</sup>  |
| 53  | C (11)                         | 17                     | Yes                 | 123                               | Liver failure                            | Had two admissions for hepatic hydrothorax and later died of liver                                                                                                                                                   | Yes             | No <sup>‡</sup> | No <sup>‡</sup>  |

|    |        |    |     |    |               |                                                                                                                                                                     |     |     |     |
|----|--------|----|-----|----|---------------|---------------------------------------------------------------------------------------------------------------------------------------------------------------------|-----|-----|-----|
|    |        |    |     |    |               | failure. The subject had ongoing SAEs of hepatic hydrothorax and liver failure.                                                                                     |     |     |     |
| 57 | C (11) | 17 | Yes | 90 | Liver failure | Diagnosed with infiltrative and metastatic HCC and was not a candidate for treatment. Died of liver failure. The subject had ongoing SAEs of HCC and liver failure. | Yes | No‡ | No‡ |
| 58 | C (11) | 15 | Yes | 80 | Sepsis        | Presented with ascites and impaired breathing and died of sepsis. The subject had an ongoing SAE of ascites.                                                        | Yes | No‡ | No‡ |

All the patients who died were male. \*Died 6 and 3 days after treatment initiation respectively; †No deaths were related to treatment; ‡Imputed value. CTP, Child–Turcotte–Pugh; MELD, Model for End-stage Liver Disease; N/A, not applicable; SAE, serious adverse event; SVR4, sustained virologic response after 4 weeks post treatment; SVR12, sustained virologic response after 12 weeks post treatment; SVR24, sustained virologic response after 24 weeks post treatment.

**Table S2.** Baseline characteristics of subjects who achieved SVR24 and those who did not achieve SVR24.

|                                            | No SVR24*<br>N = 7 | SVR24†<br>N = 24 |
|--------------------------------------------|--------------------|------------------|
| Mean age, years (range)                    | 58 (53–64)         | 54 (39–67)       |
| Male, <i>n</i> (%)                         | 7 (100.0)          | 18 (75.0)        |
| Race, <i>n</i> (%)                         |                    |                  |
| White                                      | 3 (42.9)           | 14 (58.3)        |
| Black                                      | 2 (28.6)           | 4 (16.7)         |
| Other/not stated                           | 2 (28.6)           | 6 (25.0)         |
| HCV GT, <i>n</i> (%)                       |                    |                  |
| 1a                                         | 5 (71.4)           | 11 (45.8)        |
| 1b                                         | 0 (0.0)            | 2 (8.3)          |
| 2                                          | 0 (0.0)            | 4 (16.7)         |
| 3                                          | 2 (28.6)           | 5 (20.8)         |
| Indeterminate‡                             | 0 (0.0)            | 2 (8.3)          |
| CTP class, <i>n</i> (%)                    |                    |                  |
| B (7–9)                                    | 1 (14.3)           | 8 (33.3)         |
| C (10–15)                                  | 6 (85.7)           | 16 (66.7)        |
| MELD score, <i>n</i> (%)                   |                    |                  |
| 10–15                                      | 4 (57.1)           | 9 (37.5)         |
| 16–20                                      | 2 (28.6)           | 14 (58.3)        |
| 21–25                                      | 1 (14.3)           | 1 (4.2)          |
| Ascites, <i>n</i> (%)                      |                    |                  |
| None                                       | 0 (0.0)            | 3 (12.5)         |
| Mild/moderate                              | 4 (57.1)           | 16 (66.7)        |
| Severe                                     | 3 (42.9)           | 5 (20.8)         |
| Encephalopathy, <i>n</i> (%)               |                    |                  |
| None                                       | 0 (0.0)            | 5 (20.8)         |
| Medication-controlled                      | 7 (100.0)          | 19 (79.2)        |
| HCV RNA, log <sub>10</sub> IU/mL mean (SD) | 5.0 (0.7)          | 5.2 (1.3)        |
| HCV RNA ≥800,000 IU/mL, <i>n</i> (%)       | 1 (14.3)           | 7 (29.2)         |
| HCV treatment experienced, <i>n</i> (%)§   | 0 (0.0)            | 4 (16.7)         |
| eGFR <sub>CG</sub> , mL/min, mean (SD)     | 120.9 (47.3)       | 111.5 (41.9)     |
| AST, U/L, mean (SD)                        | 102.0 (63.7)       | 102.0 (64.7)     |
| ALT, U/L, mean (SD)                        | 53.6 (35.9)        | 50.3 (36.4)      |
| Platelets, ×10 <sup>3</sup> /μL, mean (SD) | 83.9 (30.8)        | 92.3 (31.3)      |
| Albumin, g/dL, mean (SD)                   | 2.7 (0.5)          | 2.8 (0.5)        |
| INR, mean (SD)                             | 1.5 (0.3)          | 1.5 (0.3)        |
| Hemoglobin, g/dL, mean (SD)                | 12.1 (1.3)         | 11.9 (1.3)       |
| Lymphocytes, ×10 <sup>3</sup> /μL (SD)     | 1.3 (0.9)          | 1.8 (0.9)        |
| Bilirubin, mg/dL, mean (SD)                | 3.5 (1.5)          | 3.4 (1.6)        |

\*Treatment-emergent deaths *n* = 2; non-treatment-emergent deaths *n* = 4; relapse *n* = 1. The patient who discontinued treatment due to investigator discretion has been excluded; †SVR24 was imputed for two patients who died after achieving SVR12, at post-treatment study day 103 and 164 respectively; ‡Viral load too low to assess; §Treatment-experienced subjects must have completed their most recent HCV treatment at least 8 weeks prior to screening. ALT, alanine aminotransferase; AST, aspartate aminotransferase; CTP, Child–Turcotte–Pugh; eGFR<sub>CG</sub>, estimated glomerular filtration rate by Cockcroft–Gault formula; GT, genotype; HCV, hepatitis C virus; INR, international normalized ratio; IU, international units; MELD, Model for End-stage Liver Disease; SD, standard deviation; SVR24, sustained virologic response after 24 weeks post treatment.

**Table S3.** Relapse.

| Gender | Age | Genotype | Com-<br>pleted<br>treatment | Adherence<br>rate | HCV RNA (IU/mL) |        |        |        |         |              |               |               |
|--------|-----|----------|-----------------------------|-------------------|-----------------|--------|--------|--------|---------|--------------|---------------|---------------|
|        |     |          |                             |                   | Day 1           | Week 2 | Week 4 | Week 8 | Week 12 | PT<br>Week 4 | PT<br>Week 12 | PT<br>Week 24 |
| Male   | 60  | 3a       | Yes                         | 100%              | 45500           | <LLOQ  | <15    | <LLOQ  | <LLOQ   | 51           | <15           | 9740          |

HCV, hepatitis C virus; IU, international units; <LLOQ, less than the lower limit of quantitation; PT, post treatment.

**Table S4.** Change in HRQoL in patients with improved or not improved CTP class between baseline and post-treatment Week 12.

| Change between baseline and post-treatment<br>Week 12 | Improved<br>N = 15 | Not improved<br>N = 3 |
|-------------------------------------------------------|--------------------|-----------------------|
| CTP class, mean (SD)                                  | -2 (1.3)           | 0 (0.0)               |
| SF-36                                                 |                    |                       |
| Physical component score, mean (SD)                   | -0.3 (8.5)         | -9.2 (7.3)            |
| Mental component score, mean (SD)                     | 0.4 (8.9)          | -4.4 (7.5)            |
| CLDQ-HCV overall score, mean (SD)                     | 0.5 (0.8)          | -0.6 (0.7)            |
| FACIT-F overall score, mean (SD)                      | 4.3 (16.8)         | -10.8 (18.8)          |

Only 2 subjects completed the WPAI: Hep C percent overall work impairment due to HCV questionnaire so the results are not included here. Excludes patients who received LT ( $n = 3$ ) and patients with no baseline or post-treatment Week 12 CTP score or HRQoL data. CLDQ-HCV, Chronic Liver Disease Questionnaire-Hepatitis C; CTP, Child-Turcotte-Pugh; FACIT-F, Functional Assessment of Chronic Illness Therapy-Fatigue; HRQoL, health-related quality of life; LT, liver transplant; SD, standard deviation; SF-36, 36-Item Short Form Survey; WPAI: Hep C, Work Productivity and Activity Impairment: Hepatitis C.
